# Supplementary material
Source: HighWire-hosted journal article supplement (https://www.genetics.org/content/suppl/2012/08/08/genetics.112.143271)
Supplement: genetics.112.143271-11.pdf [file genetics.112.143271-11.pdf]

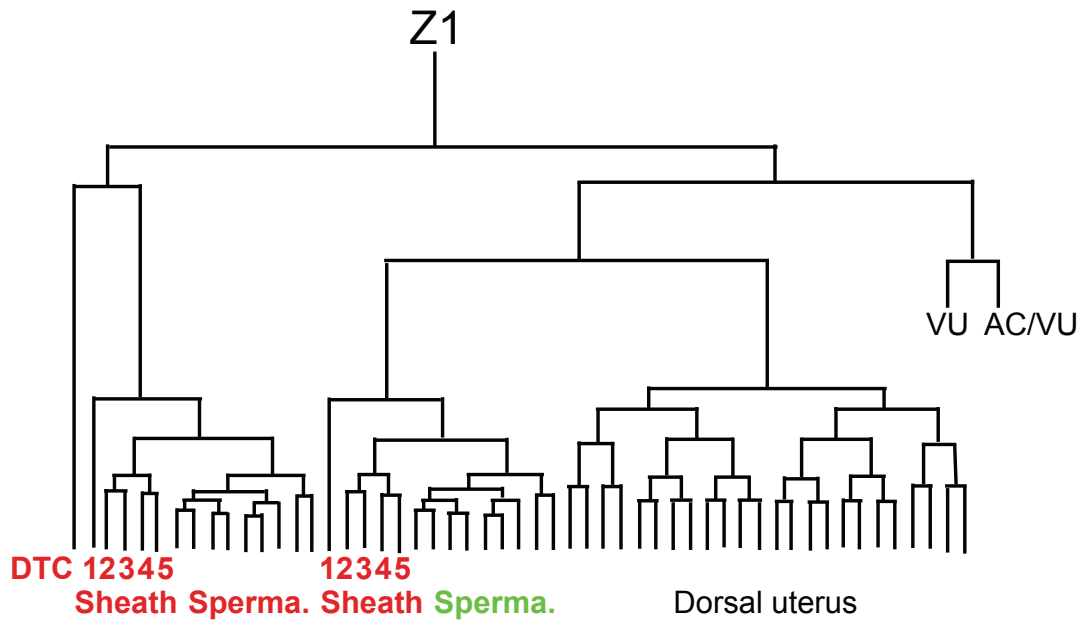

**Figure S11** *twk-1* functions in the somatic gonad downstream of *acy-4*. A genetic mosaic animal resulting from multiple independent losses of the *twk-1(+)*-bearing extrachromosomal array in the anterior somatic gonadal lineage (Z1). This animal was fertile in the anterior arm, indicating suppression of *acy-4(lf)* sterility, but sterile in the posterior arm. Green characters represent the presence of the *twk-1(+)* array, and red characters represent the absence of the *twk-1(+)* array. Uterine cells were not scored.
